51. Arraes SM, Freitas MS, da Silva SV, de Paula Neto HA, Alves-Filho JC, Auxiliadora Martins M, Basile-Filho A, Tavares-Murta BM, Barja-Fidalgo C, Cunha FQ: Impaired neutrophil chemotaxis in sepsis associates with GRK expression and inhibition of actin assembly and tyrosine phosphorylation. *Blood* 2006; 108:2906–13
52. Rios-Santos F, Alves-Filho JC, Souto FO, Spiller F, Freitas A, Lotufo CM, Soares MB, Dos Santos RR, Teixeira MM, Cunha FQ: Down-regulation of CXCR2 on neutrophils in severe sepsis is mediated by inducible nitric oxide synthase-derived nitric oxide. *Am J Respir Crit Care Med* 2007; 175:490–7
53. Secher T, Vasseur V, Poisson DM, Mitchell JA, Cunha FQ, Alves-Filho JC, Ryffel B: Crucial role of TNF receptors 1 and 2 in the control of polymicrobial sepsis. *J Immunol* 2009; 182:7855–64
54. Kaufmann SHE, Dorhoi A: Molecular determinants in phagocyte-bacteria interactions. *Immunity* 2016; 44:476–91
55. Vijay-Kumar M, Aitken JD, Carvalho FA, Cullender TC, Mwangi S, Srinivasan S, Sitaraman SV, Knight R, Ley RE, Gewirtz AT: Metabolic syndrome and altered gut microbiota in mice lacking Toll-like receptor 5. *Science* 2010; 328:228–31

## ANESTHESIOLOGY REFLECTIONS FROM THE WOOD LIBRARY-MUSEUM

# Carbon-Tetrachloride Anesthesia? Edmund Andrews's Efforts before Oxygenating Nitrous Oxide

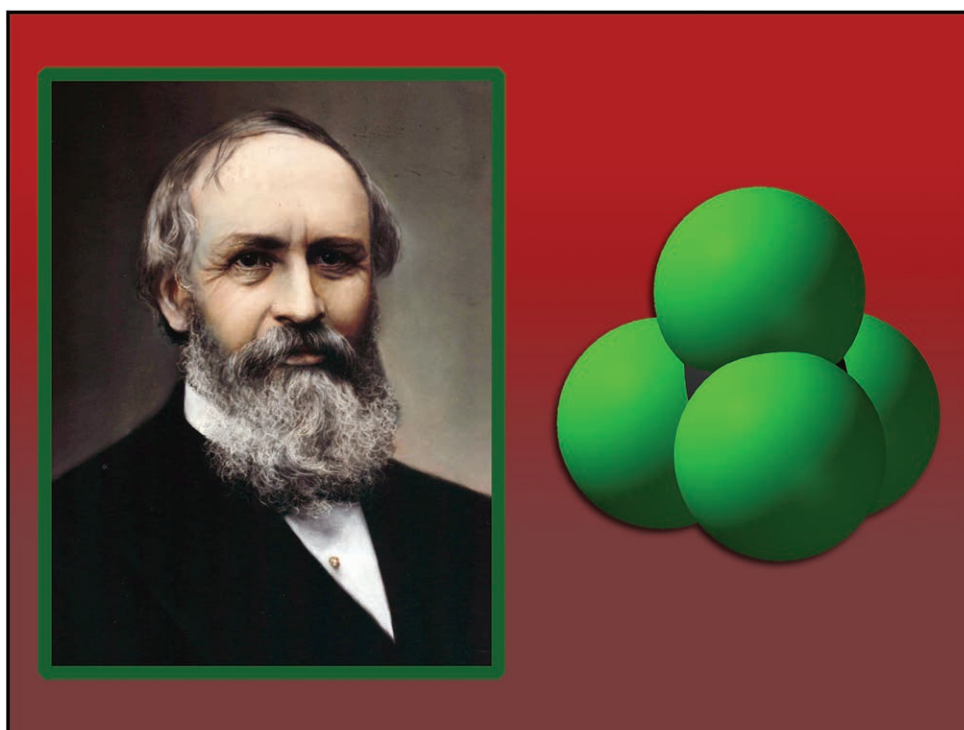

Chicago surgeon Edmund Andrews is best known for encouraging in 1868 the oxygenation of nitrous oxide anesthetics. However, 1 yr earlier, Dr. Andrews had spent time observing  $\text{CCl}_4$  or carbon tetrachloride anesthesia in London hospitals. On returning to Chicago, Dr. Andrews noted that the tetrachloride of carbon promised “freedom from nauseating effects,” such as those caused by ether. However, when Dr. Andrews’s friend, Dr. Sherman, administered the promising new agent to their patient in Chicago, the patient’s “pulse and respiration both suddenly ceased.” An unnerved Dr. Andrews determined that he himself would “not venture on the use of the article again, unless very extensive experience by others demonstrates its safety.” (Copyright © the American Society of Anesthesiologists’ Wood Library-Museum of Anesthesiology.)

*George S. Bause, M.D., M.P.H., Honorary Curator and Laureate of the History of Anesthesia, Wood Library-Museum of Anesthesiology, Schaumburg, Illinois, and Clinical Associate Professor, Case Western Reserve University, Cleveland, Ohio. UJYC@aol.com.*
